# Supplementary material
Source: PubMed Central journal article supplement (PMC3725650)
Supplement: NIHMS491670-supplement-1.pdf [file NIHMS491670-supplement-1.pdf]

## **Supplementary Information**

A common variant in the melatonin receptor gene (*MTNR1B*) is associated with increased risk of future type 2 diabetes and impaired early insulin secretion

Valeriya Lyssenko, Cecilia L.F. Nagorny, Michael R. Erdos, Nils Wierup, Anna Jonsson, Peter Spégel, Marco Bugliani, Richa Saxena, Malin Fex, Nicolo Pulizzi, Bo Isomaa, Tiinamaija Tuomi, Peter Nilsson, Johanna Kuusisto, Jaakko Tuomilehto, Michael Boehnke, David Altshuler, Frank Sundler, Johan G. Eriksson, Anne U. Jackson, Markku Laakso, Piero Marchetti, Richard M. Watanabe, Hindrik Mulder and Leif Groop

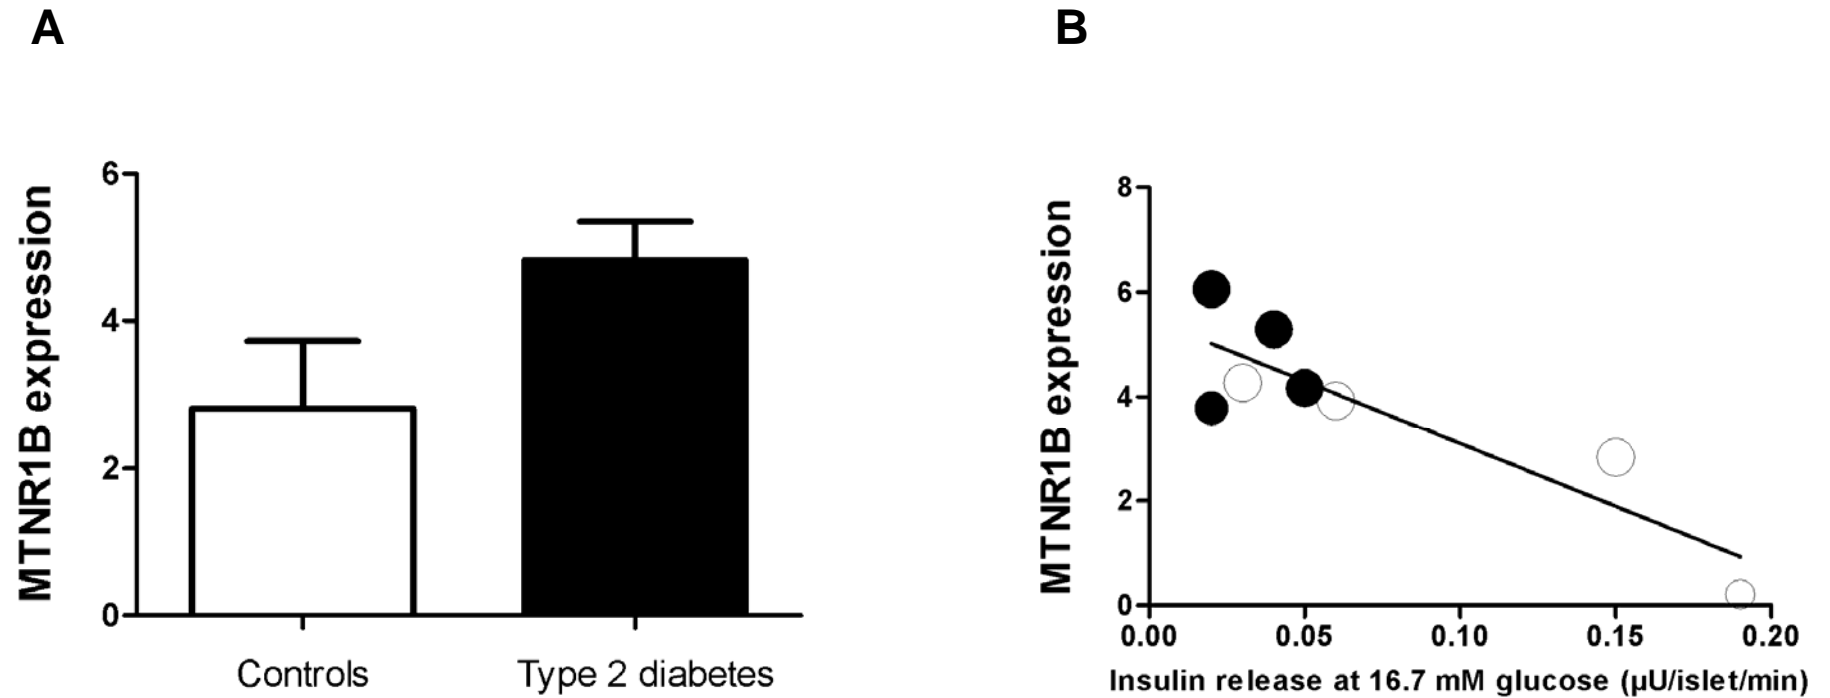

**Fig. S1 Expression of *MTNR1B* in human pancreatic islets.** (A) The *MTNR1B* mRNA levels in human pancreatic islets was 50% higher in T2D (n=4, black bar) compared to controls in the microarray studies<sup>16</sup> (n=4, white bar). Bars represent mean  $\pm$  SE. (B) Correlation between the *MTNR1B* mRNA levels and insulin release at 16.7 mM glucose<sup>15</sup>.
