# Supplementary material
Source: PubMed Central journal article supplement (PMC3725650)
Supplement: NIHMS491670-supplement-2.pdf [file NIHMS491670-supplement-2.pdf]

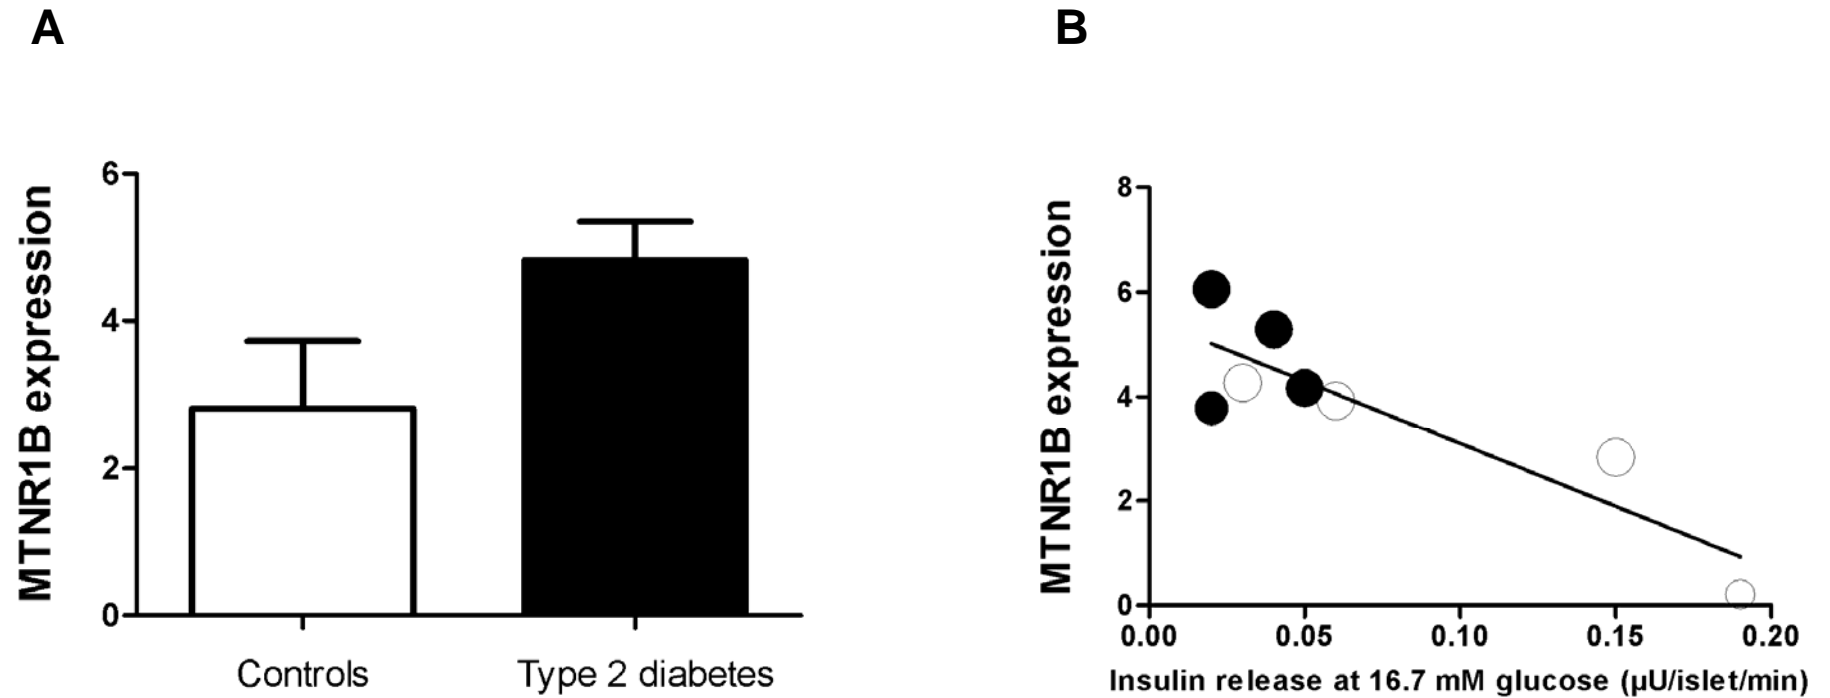

**Fig. S1 Expression of *MTNR1B* in human pancreatic islets.** (A) The *MTNR1B* mRNA levels in human pancreatic islets was 50% higher in T2D (n=4, black bar) compared to controls in the microarray studies<sup>16</sup> (n=4, white bar). Bars represent mean  $\pm$  SE. (B) Correlation between the *MTNR1B* mRNA levels and insulin release at 16.7 mM glucose<sup>15</sup>.
